# Supplementary material for: Depleted upconversion luminescence in NaYF4:Yb3+,Tm3+ nanoparticles via simultaneous two-wavelength excitation
Source: Royal Society of Chemistry journal article supplement (doi:10.1039/c7cp00099e), 2017-01-01
Supplement: c7cp00099e1.pdf [file c7cp00099e1.pdf]

## Electronic Supplementary Information

### Depleted Upconversion Luminescence in $\text{NaYF}_4:\text{Yb}^{3+},\text{Tm}^{3+}$ Nanoparticles via Simultaneous Two-Wavelength Excitation

Hongxin Zhang,<sup>a</sup> Tianqing Jia,<sup>\*a</sup> Long Chen,<sup>a</sup> Yuchan Zhang,<sup>a</sup> Shian Zhang,<sup>a</sup> Donghai Feng,<sup>a</sup> Zhenrong Sun<sup>a</sup> and Jianrong Qiu<sup>b</sup>

<sup>a</sup> *State Key Laboratory of Precision Spectroscopy, East China Normal University, Shanghai 200062, China. E-Mail: [tqjia@phy.ecnu.edu.cn](mailto:tqjia@phy.ecnu.edu.cn).*

<sup>b</sup> *Department of Materials Science and Technology, Zhejiang University, Hangzhou 310027, China.*

## 1. The influence of particle concentration on depletion efficiency

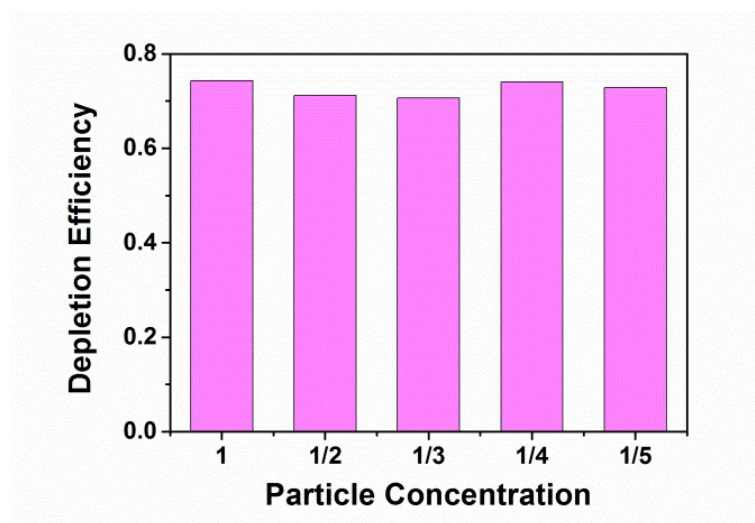

Fig. S1 The influence of particle concentration on depletion efficiency of 456 nm emission in  $\text{NaYF}_4:20\%\text{Yb}^{3+},1\%\text{Tm}^{3+}$  UCNPs excited by 980 nm ( $8.6 \text{ W cm}^{-2}$ ) and 1550 nm ( $36.6 \text{ W cm}^{-2}$ ) lasers. 1 means the initial particle concentration. 1/2, 1/3, 1/4, and 1/5 represent the concentration is one-half, one-third, one-quarter, and one-fifth of the initial particle concentration, respectively.

## 2. The UCL spectra of different doping concentrations of $\text{Tm}^{3+}$ ion

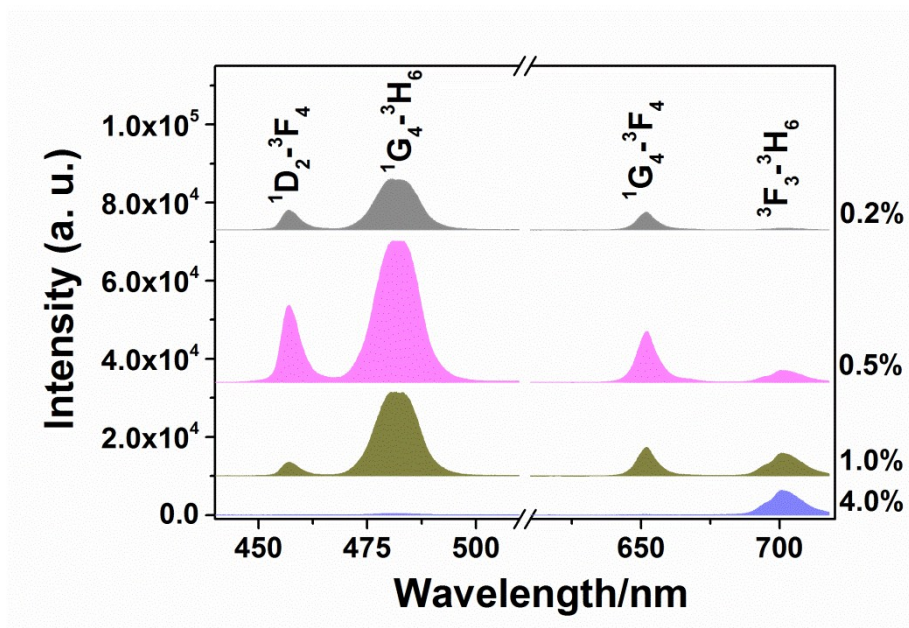

Fig. S2 The UCL spectra of  $\text{Yb}^{3+}/\text{Tm}^{3+}$  codoped UCNP with different doping concentrations of  $\text{Tm}^{3+}$  ion.

### 3. Ion distance of different contents of Tm<sup>3+</sup> ion

Ion distance is mainly dependent on ion concentration. Here, we give an estimation method. We roughly regard that Tm<sup>3+</sup> ions equably distribute in the nanocrystals.

For  $x\%$  Tm<sup>3+</sup> doped nanoparticles, there is one Tm<sup>3+</sup> ion existing in  $y$  unit cells.  $y = 100/x$  is the number of unit cells. The ion distance  $d$  can be obtained from the formula:  $d = a \times \sqrt[3]{y}$ , where  $a$  is the interplanar distance. High resolution TEM image of Tm<sup>3+</sup> doped nanoparticles in Fig. S3 shows that  $a$  is 0.51 nm.

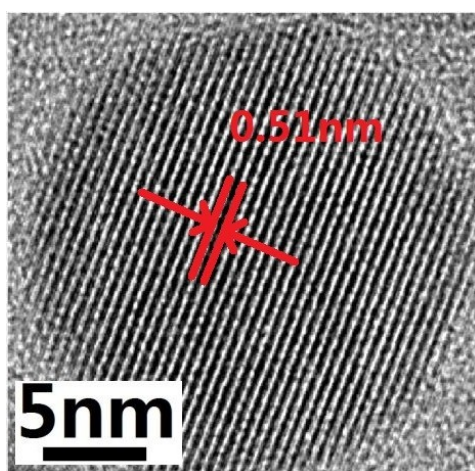

Fig. S3 HRTEM image of Tm<sup>3+</sup> doped nanoparticles.

The ion distances of different contents of Tm<sup>3+</sup> ion doped nanoparticles are calculated and shown in Table S1.

Table S1 Ion distance in different contents of Tm<sup>3+</sup> ion.

| Contents     | 0.2%   | 0.5%   | 1%     | 4%     |
|--------------|--------|--------|--------|--------|
| Ion distance | 4.0 nm | 3.0 nm | 2.4 nm | 1.5 nm |
